# Supplementary material for: Synthesis of C 60 -CM-C n and its effect on the stabilization of nitrocellulose
Source: Royal Society of Chemistry journal article supplement (doi:10.1039/d5ra01741f), 2025-01-01

## Supplementary Material

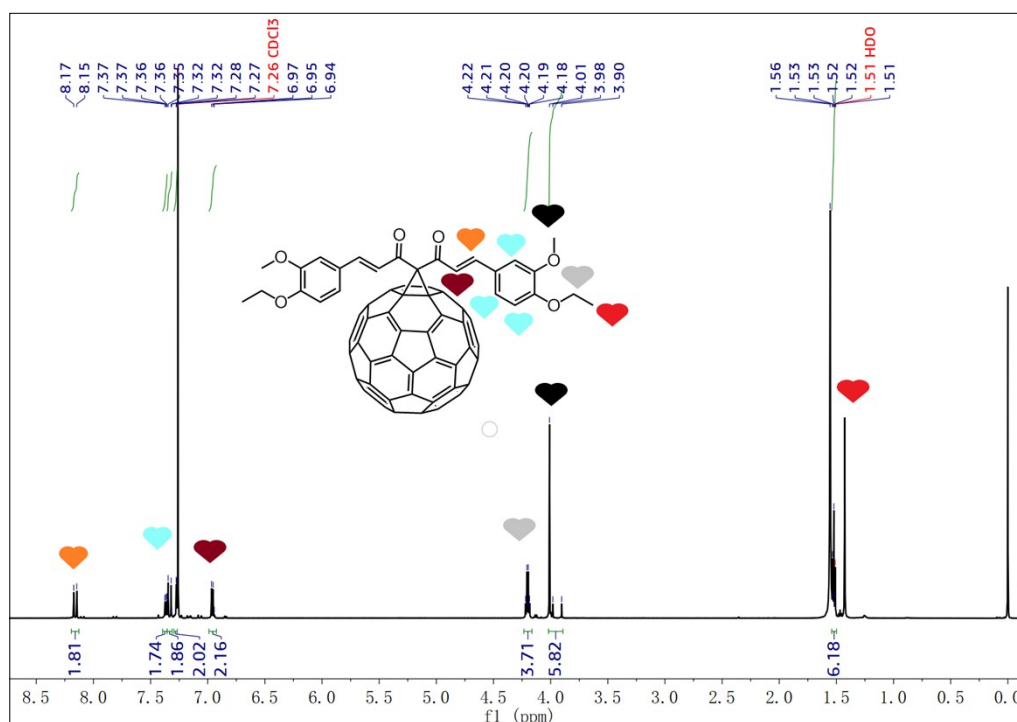

Fig. S1 <sup>1</sup>H NMR spectra of compound 2a

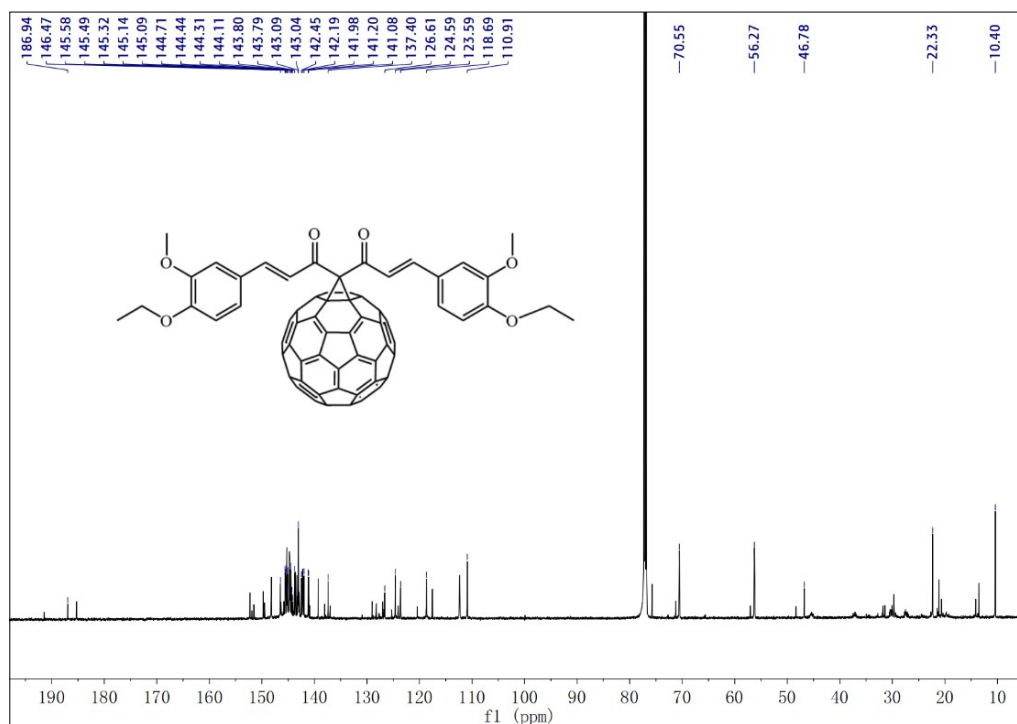

Fig. S2 <sup>13</sup>C NMR spectra of compound 2a

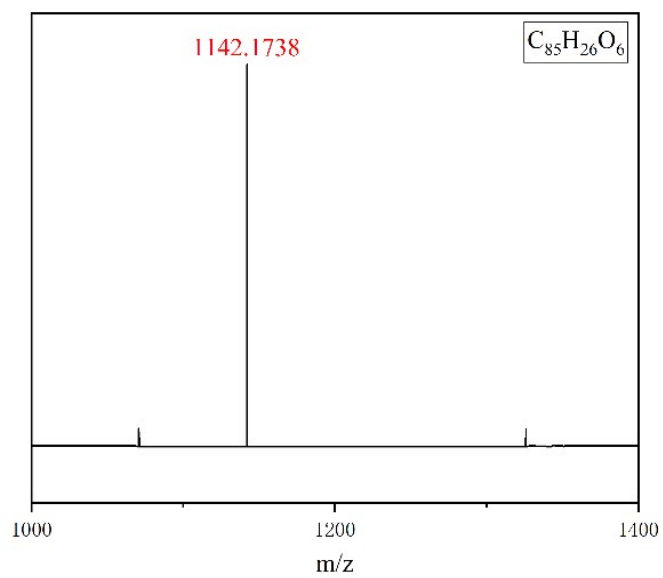

Fig. S3 HRMS of compound 2a

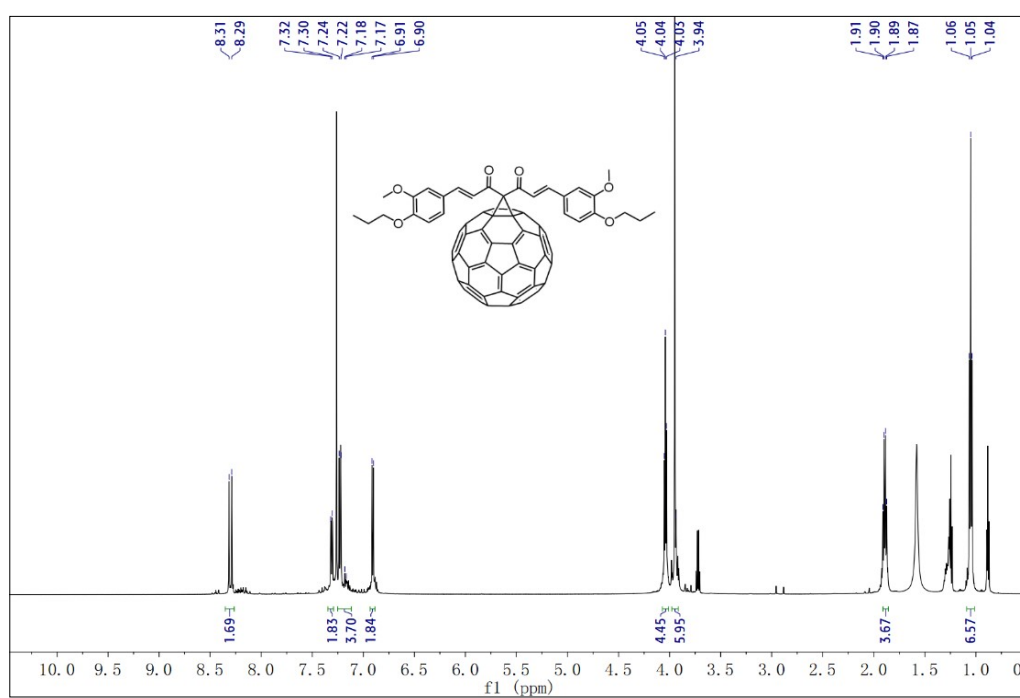

Fig. S4  $^1H$  NMR spectra of compound 2b

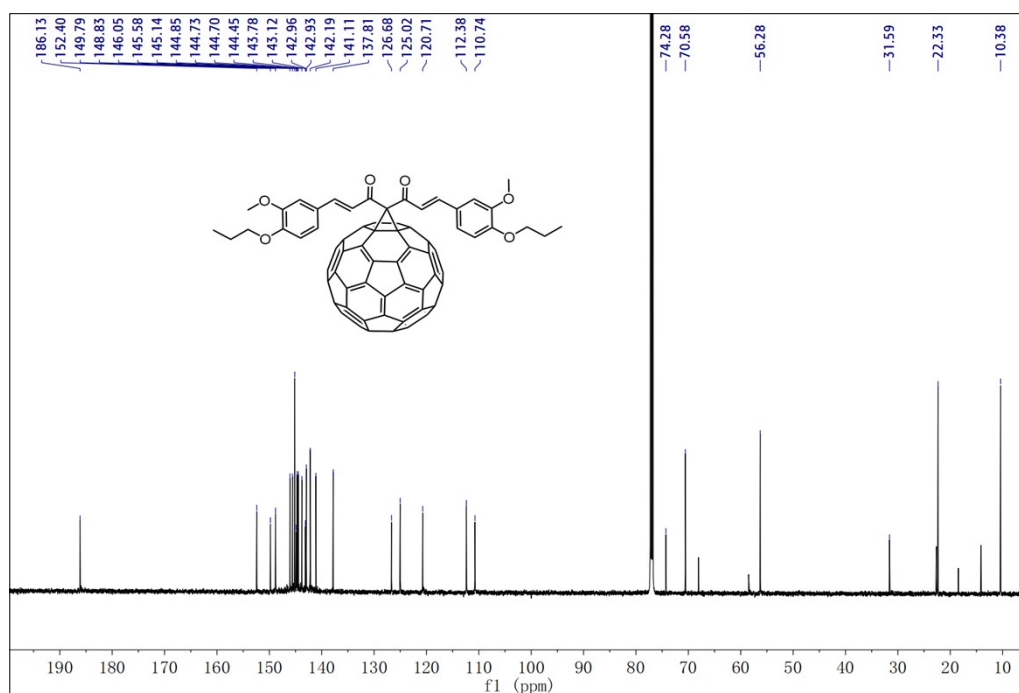

Fig. S5 <sup>13</sup>C NMR spectra of compound 2b

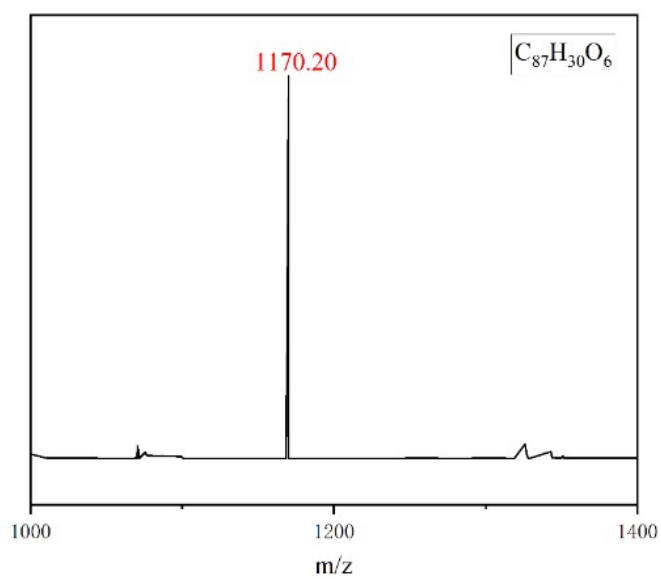

Fig. S6 HRMS of compound 2b

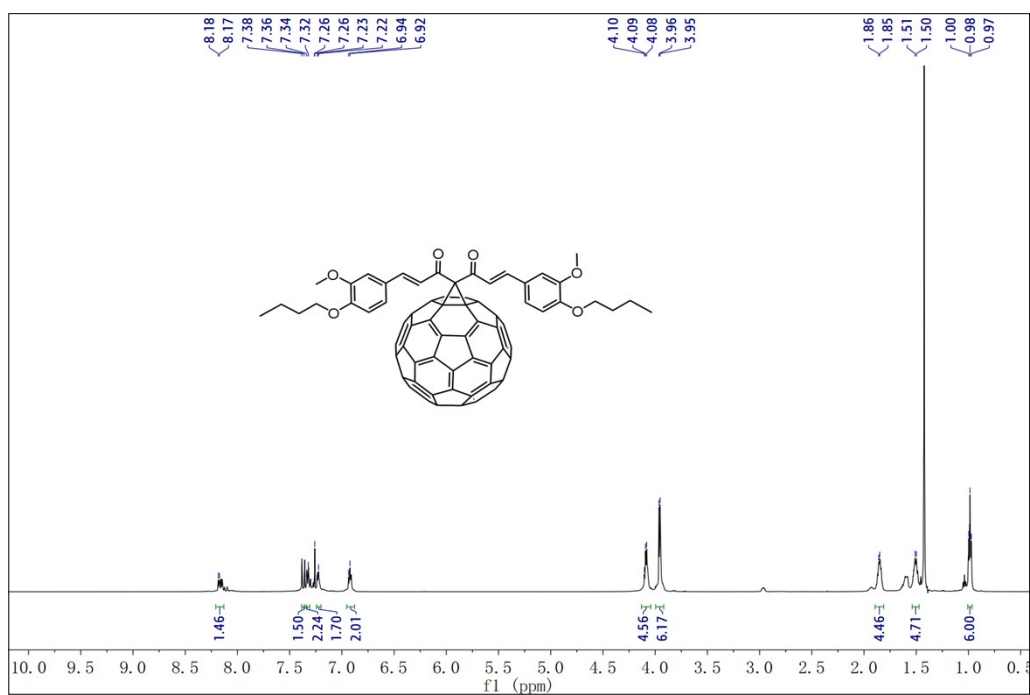

Fig. S7 <sup>1</sup>H NMR spectra of compound 2c

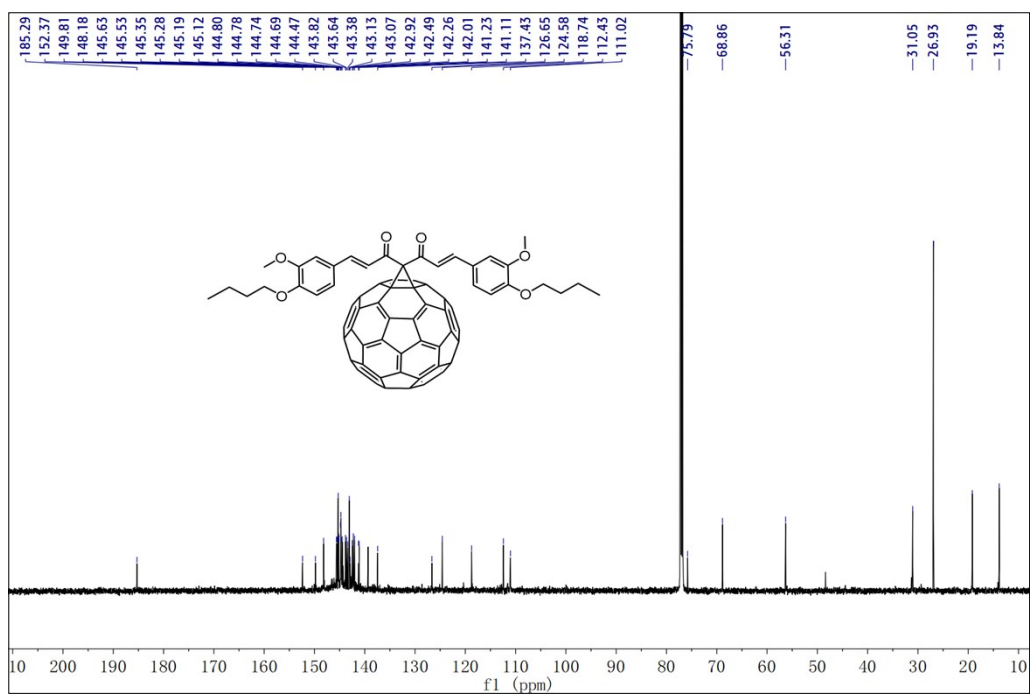

Fig. S8 <sup>13</sup>C NMR spectra of compound 2c

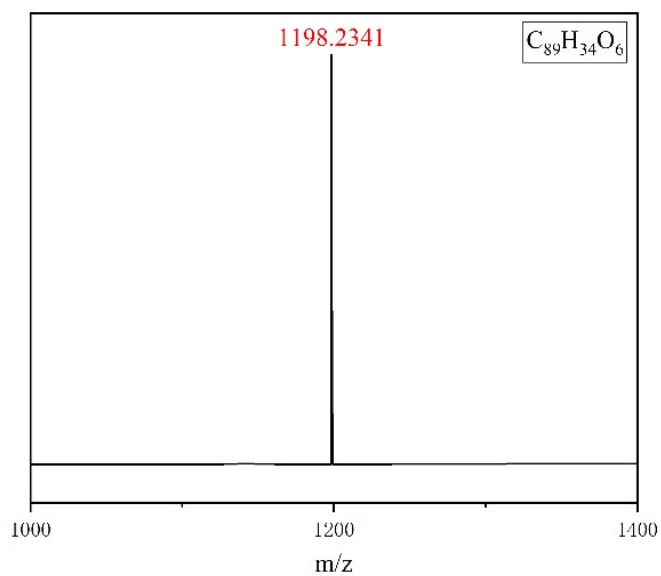

Fig. S9 HRMS of compound 2c

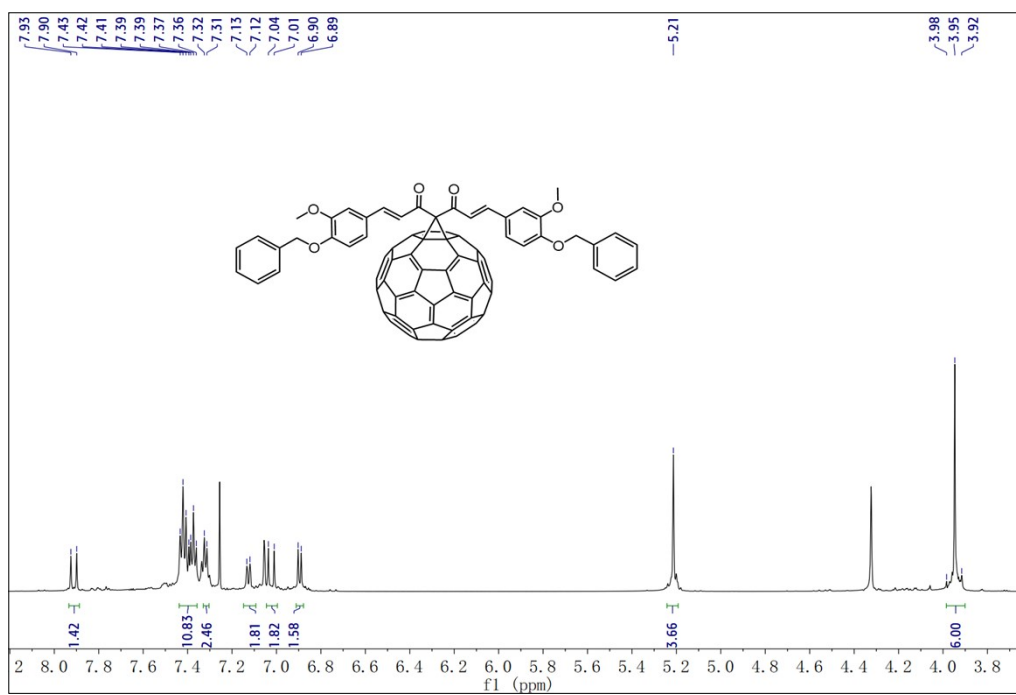

Fig. S10  $^1H$  NMR spectra of compound 2d

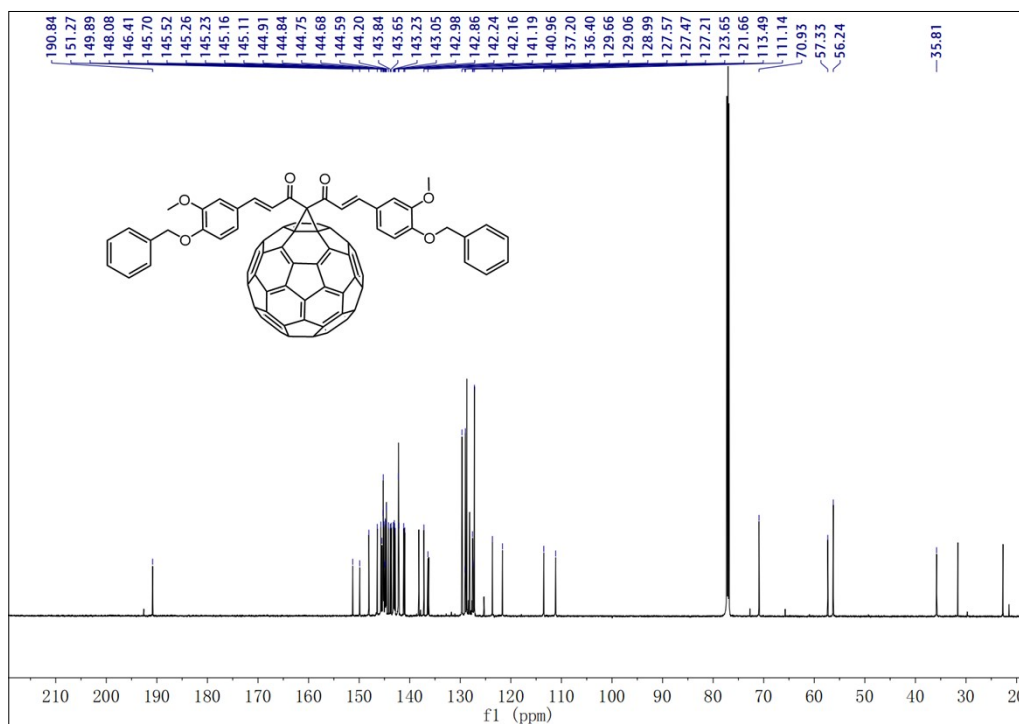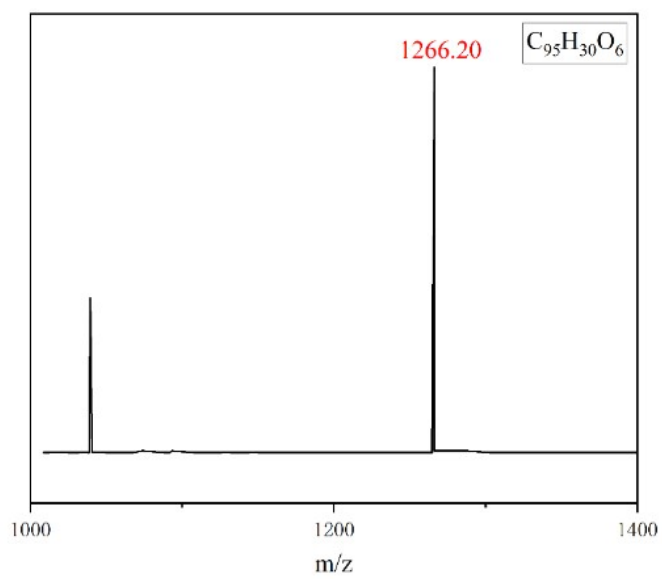

Supplement: d5ra01741f1.pdf [file d5ra01741f1.pdf]
